# Supplementary material
Source: publisher site journal article supplement (https://www.dovepress.com/article/417944)
Supplement: Supplementary file 1 [file get_supplementary_file.php]

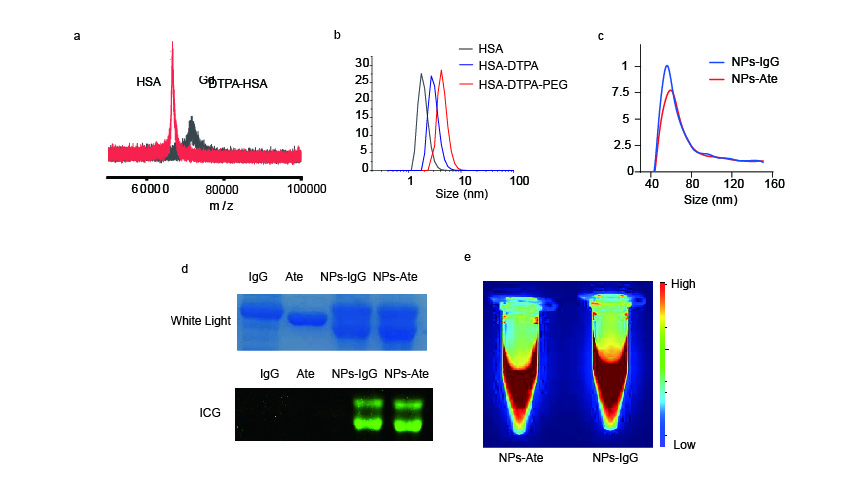
 ­

**Supplementary Fig. 1. NPs-Ate and NPs-IgG characterization.**

1. Mass spectrometry revealed distinct peaks for free HSA and GdDTPA-HSA. (b) DLS spectra displayed the size of HSA, HSA-DTPA, and HSA-DTPA-PEG. (c) The particle size of NPs-Ate and NPs-IgG detected by Nano-flow cytometry. (d) SDS-PAGE analysis was performed for NPs-Ate and NPs-IgG. The gel was stained with Coomassie brilliant blue, and an associated fluorescence image was taken. (e) Fluorescence gel signals (1000 nm–1700 nm region at an excitation wavelength of 808 nm).

**
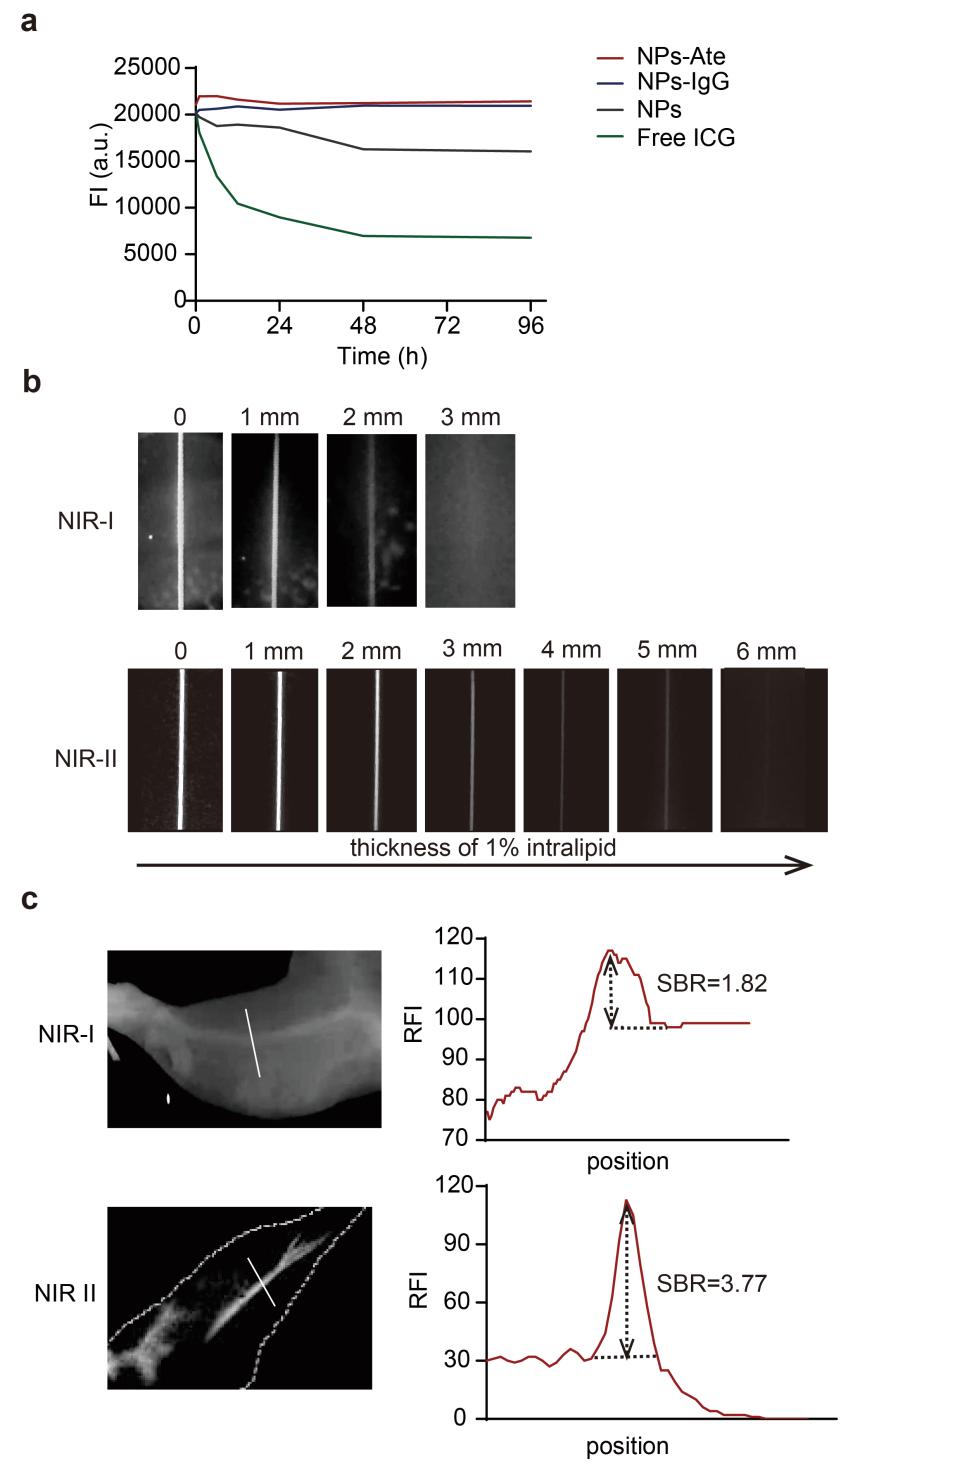
**

**Supplementary Fig. 2. NPs-Ate and NPs-IgG characterization**

1. NPs-Ate (IgG), NPs, and ICG fluorescence stability in PBS. (b) NP penetration depth in NIR-I and NIR-II at the same concentration. (c) Vascular imaging of NIR-I/II and tumor-to-background ratios (SBR). FI = Fluorescence Intensity, RFI = Relative Fluorescence Intensity.


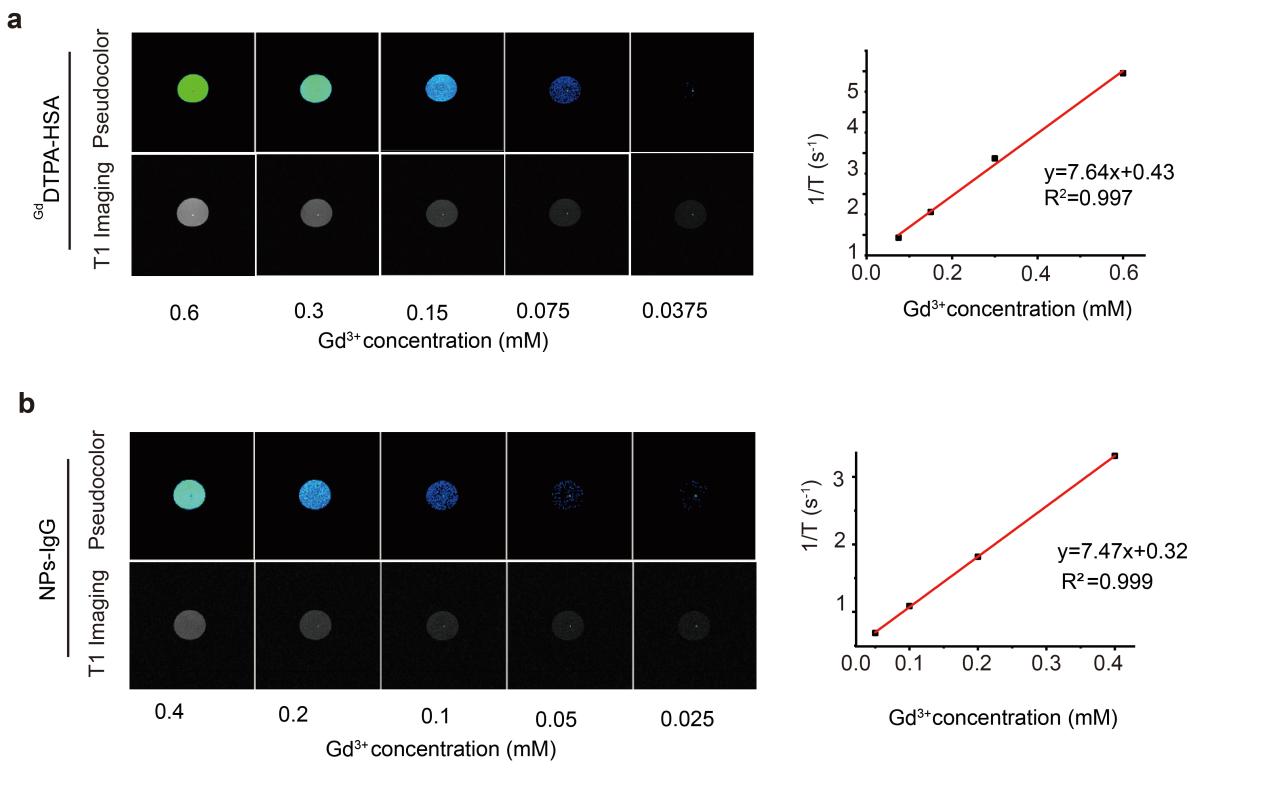
­­

**Supplementary Fig. 3****. GdDTPA-HAS and NPs-IgG MRI signals**

T1-weighted MR phantom images (Upper panels: pseudocolor) and longitudinal relaxivity (γ1) of GdDTPA-HAS (a) and NPs-IgG (b)


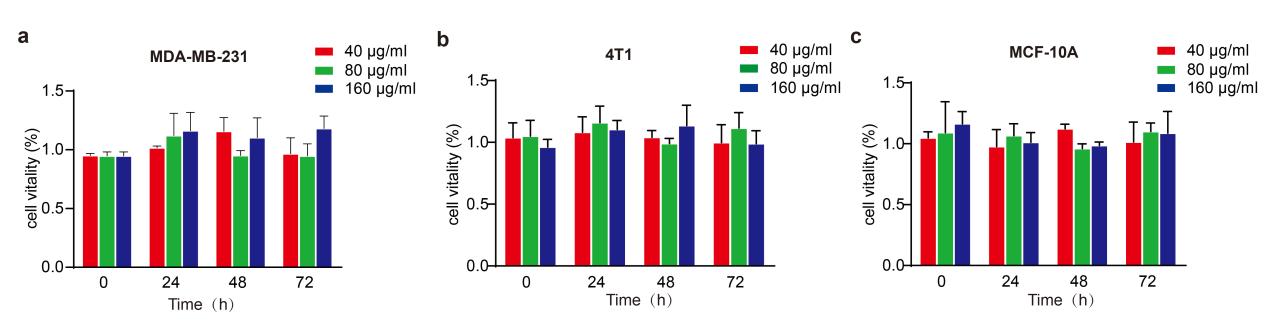


**Supplementary Fig. 4. Cytotoxicity assays**

MDA-MB-231 (a), 4T1 (b), and MCF-10A(c) cells incubated with NPs-Ate at different concentrations: 40, 80, and 160 µg/ml NPs-Ate for different times (0, 24, 48, and 72 h).


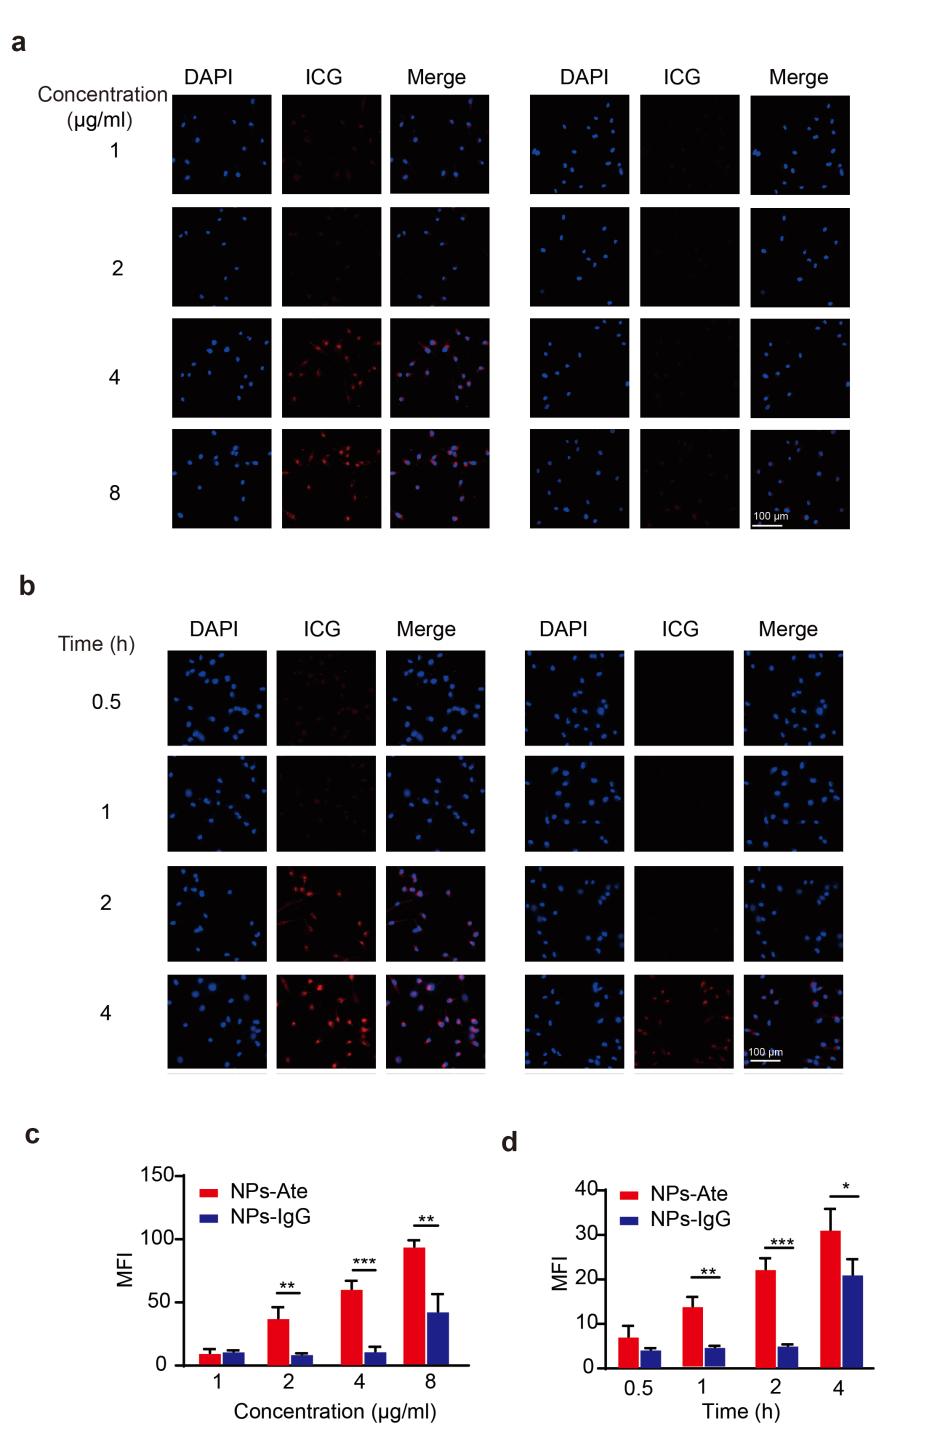


**Supplementary Fig. 5. MDA-MB-231 cells incubated with different NPs-Ate concentration and times**

(a, b) MDA-MB-231 cells incubated with different NPs-Ate concentrations (20, 40, 80, and 160 µg/ml = 1, 2, 4, 8 µg/ml ICG, respectively) in 2 h. (c, d) Fluorescent signal intensity of MDA-MB-231 cells at different time points (0.5, 1, 2, and 4 h) with 40 µg/ml NPs-Ate; (b, d) Quantitative analyses of cell fluorescent signals. Data are represented as the mean ± standard deviation (n=3), *** *P* < 0.001 and ** *P* < 0.01. MFI = Mean Fluorescence Intensity. Scale bar = 100 µm.


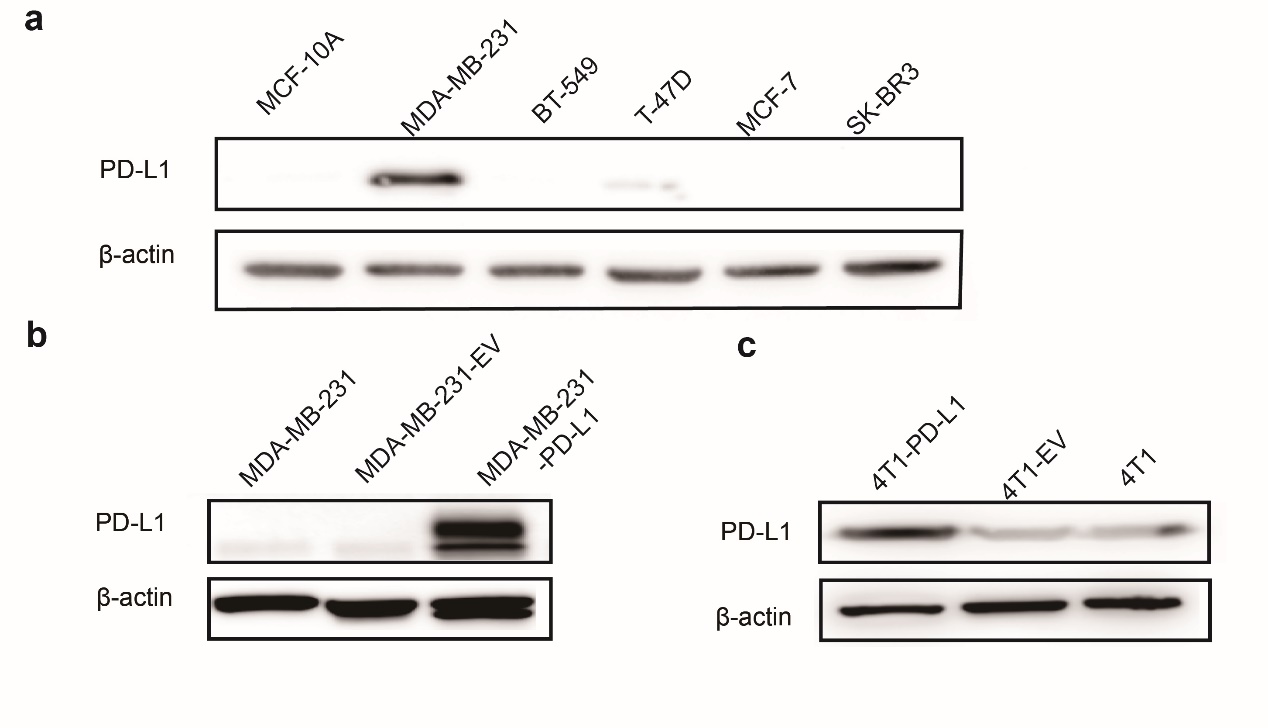


**Supplementary Fig. 6. PD-L1 expression in different cell lines**

(a). Western blot showing PD-L1 expression in different breast cancer and the normal breast cell line MCF-10A. (b) Western blot showing PD-L1 expression in MDA-MB-231 cells and over expressed PD-L1 cells MDA-MB-231-PD-L1 and control MDA-MB-231-EV. (c) Western blot of PD-L1 showing in 4T1 cells and high PD-L1 expression cells 4T1-PD-L1 and control 4T1-EV.


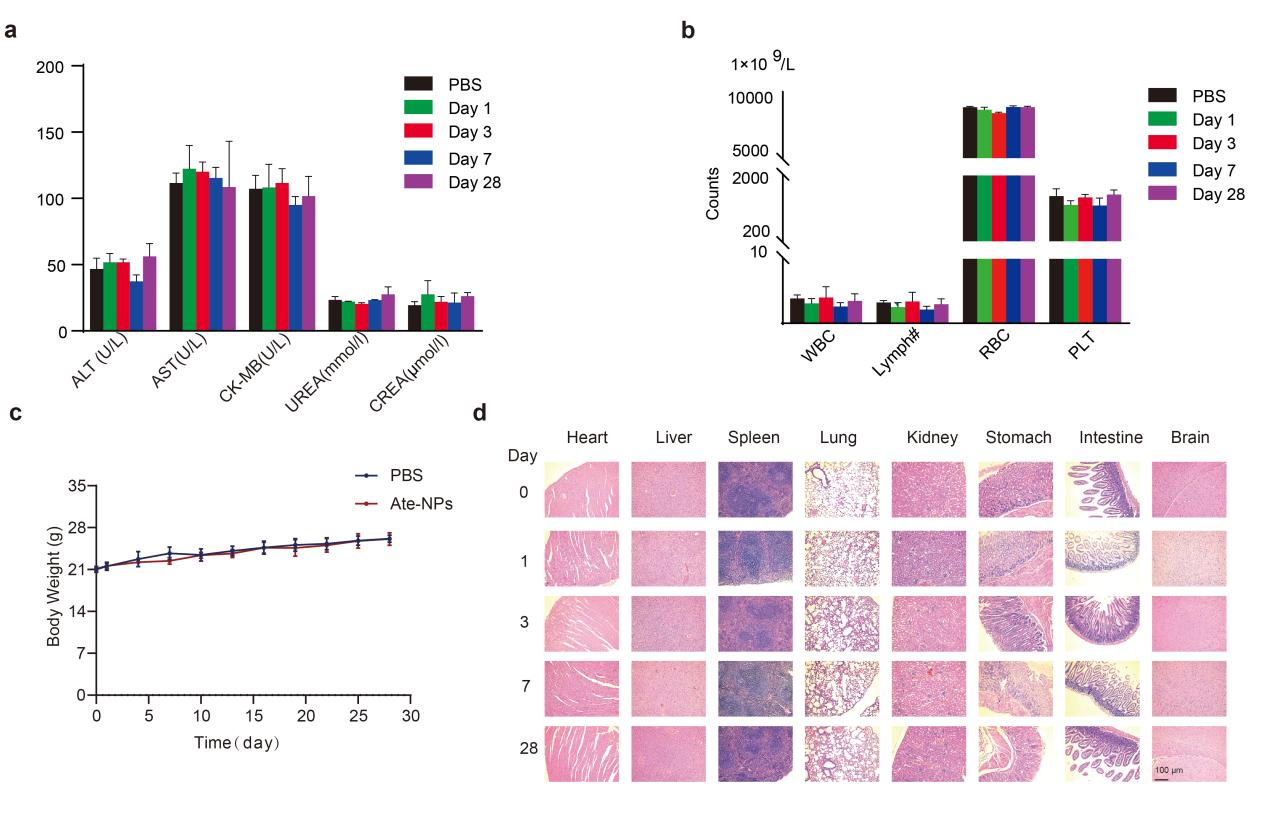


**Supplementary Fig. 7. NPs-Ate biosafety**

(a) Serum biochemistry results (ALT: Alanine transaminase; AST: Aspertate aminotransferase, CK-MB: creatine kinase-MB, UREA: , and CREA: creatinine) in BALB/c mice at different time points (1, 7, and 30 days) after NPs-Ate or saline (control) intravenous injection. (b) Routine blood results (WBC: white blood cells, Lymph: lymphocytes, RBC: White blood cells, and PLT: Platelets) in BALB/c mice at different time points (1, 7, and 30 days) after NPs-Ate or saline (control) intravenous injection. (c) Body weight curves of mice treated intravenously with saline (control) or NPs-Ate. (d) Hematoxylin & Eosin staining of vital organs (heart, liver, spleen, lung, kidney, stomach, intestines, and brain) in different days. Scale bar = 100 μm. Data are represented as the mean ± standard deviation (n=3).


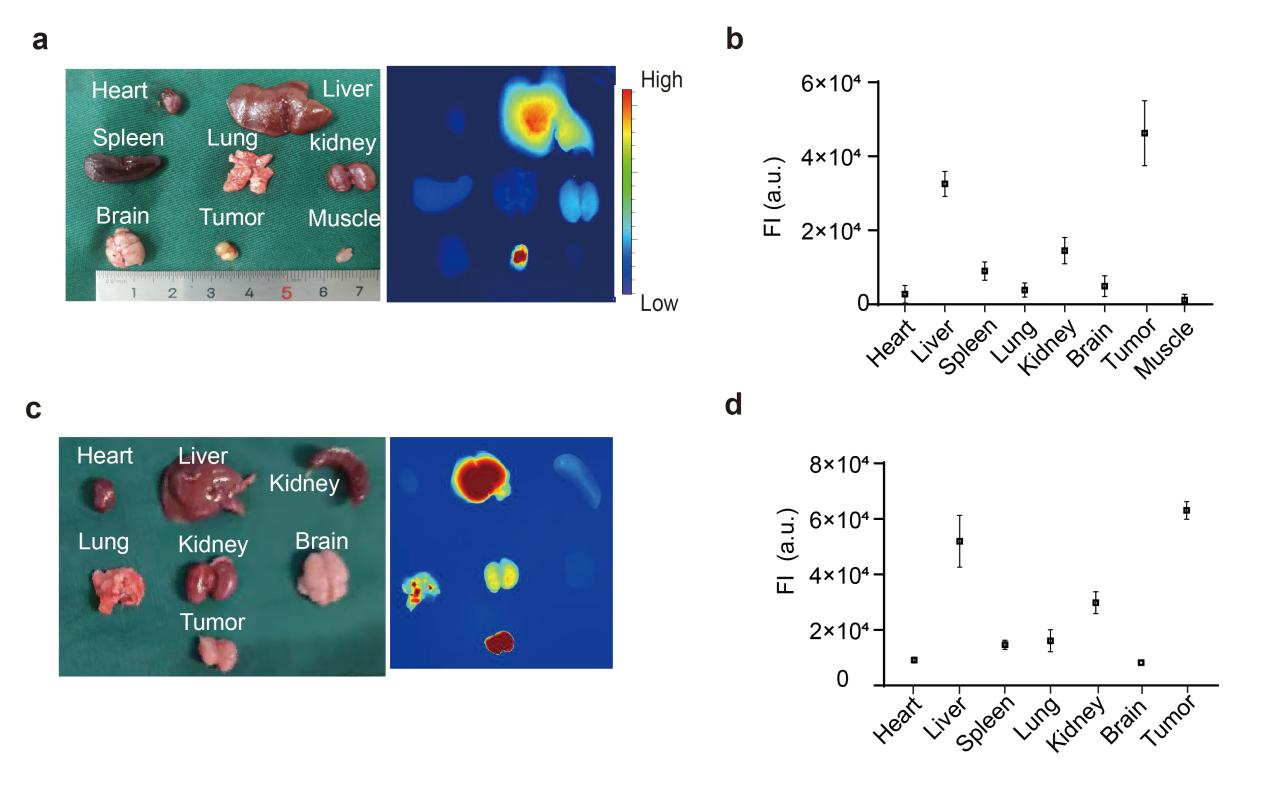


**Supplementary Fig.** **8. NPs-Ate** **bio-distribution**

(a–d) MDA-MB-231 and 4T1-PD-L1 tumor mouse models were intravenously injected with NPs-Ate and mice were humanely sacrificed at 36 h post-injection. (a, c) Main organs (heart, liver, tumor, lung, spleen, kidney, brain, and tumor) were collected and (b, d) fluorescence intensity detected. FI = Fluorescence Intensity


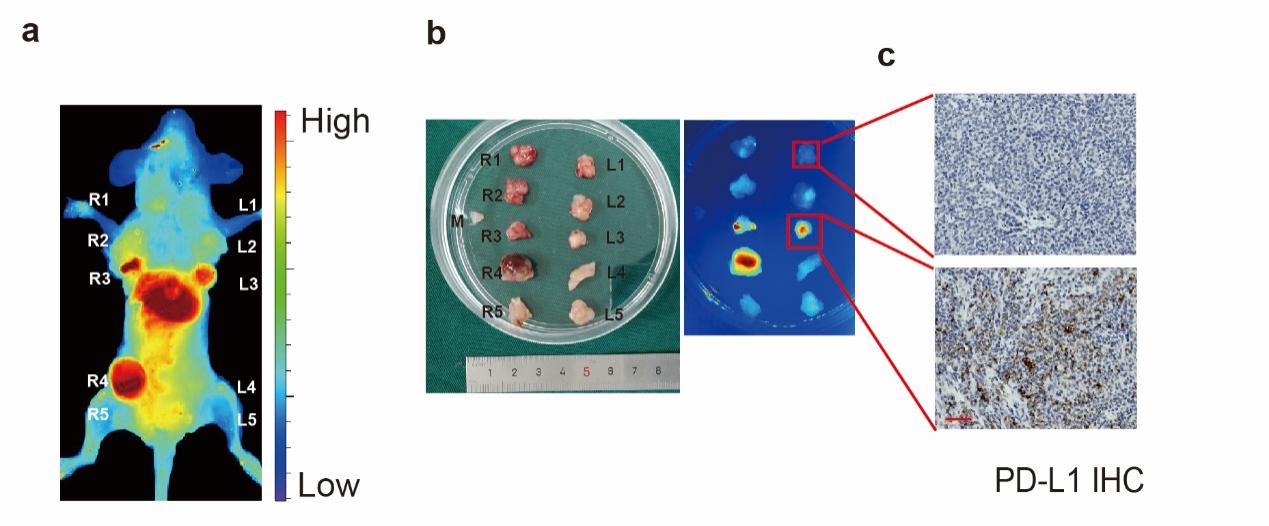


**Supplementary Fig. 9. *In vivo* fluorescence images in the MMTV-PyVT mouse model.**

1. Fluorescence image showing a MMTV-PyVT mouse after NPs-Ate injection at 36. (R; right; L: left 1-5: five pairs of mammary glands (breast cancer) h. (b) *In vitro* fluorescence tumor imaging. (c) IHC of PD-L1 in tumor tissue. scale bar =50 µm


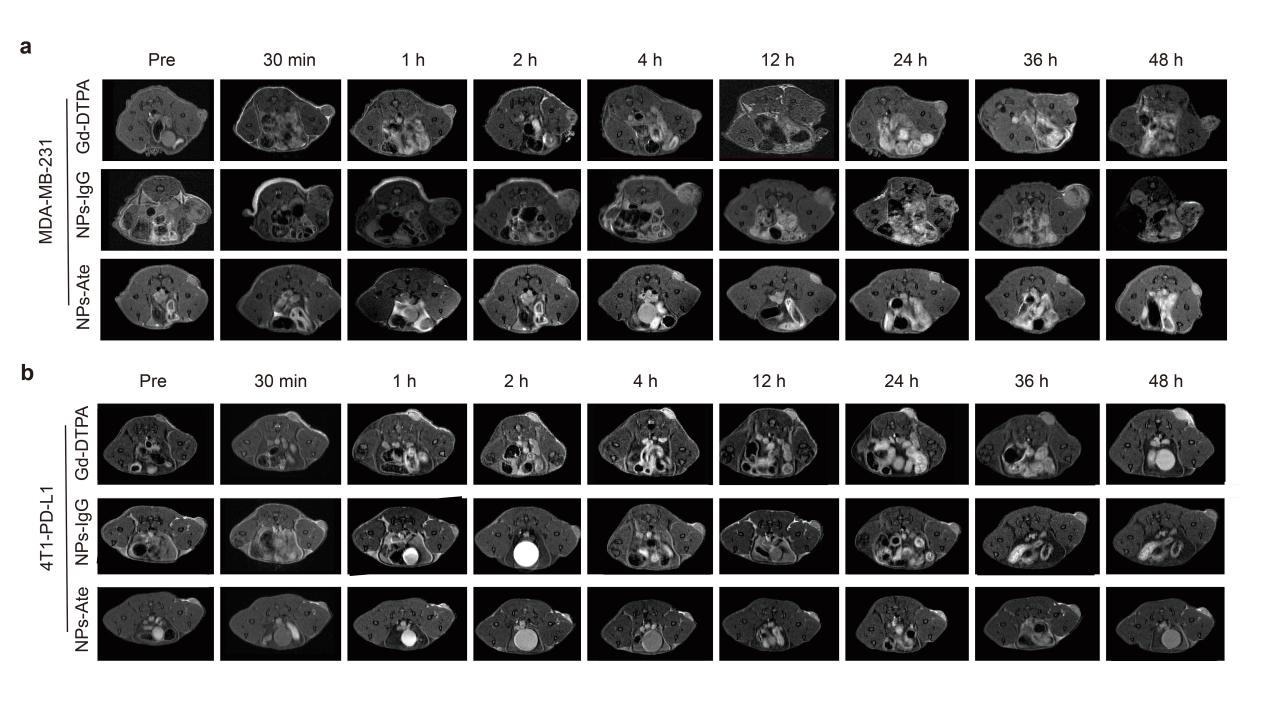


**Supplementary Fig. 10. *In vivo* T1-weighted MRI**

(a) MDA-MB-231 and (b) 4T1-hPD-L1 tumor-bearing mice before injection (Pre), and at 0.5, 1, 2, 4, 12, 24, 36, and 48 h after intravenous injection of NPs-Ate, NPs-IgG, and Gd-DTPA at 23.5 mg/kg Gd.


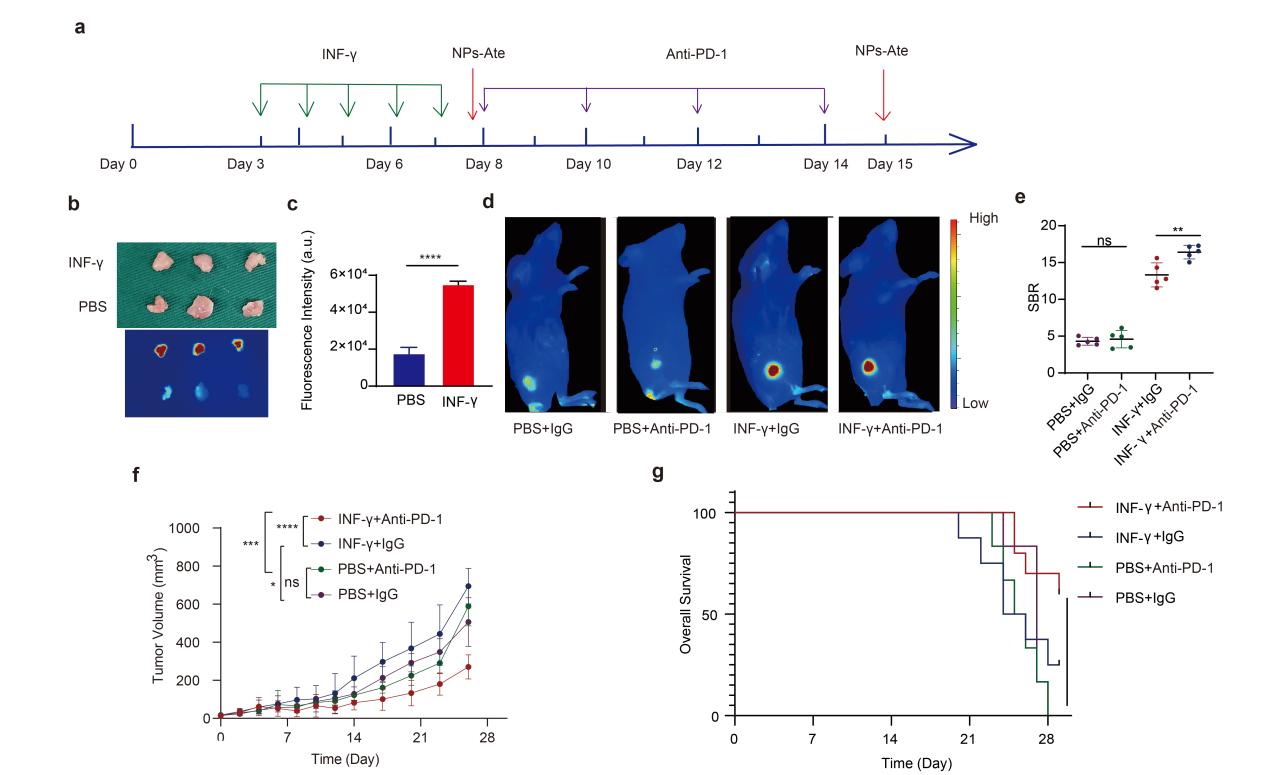


**Supplementary Fig. 11. INF-γ combined with PD-1 therapy**

(a) The treatment process. (b) The fluorescent picture of tumor tissue after INF-γ intervention on day 8 and (c) their quantitation. (d) the fluorescent pictures of INF-γ combine PD-1 treatment model on day 15 and (e) their quantitation. (f) Tumor volume during treatment. (g) Overall survival. Data are represented as the mean ± standard deviation (n=3), *** *P* < 0.001, ** *P* < 0.01, and **P* < 0.05.


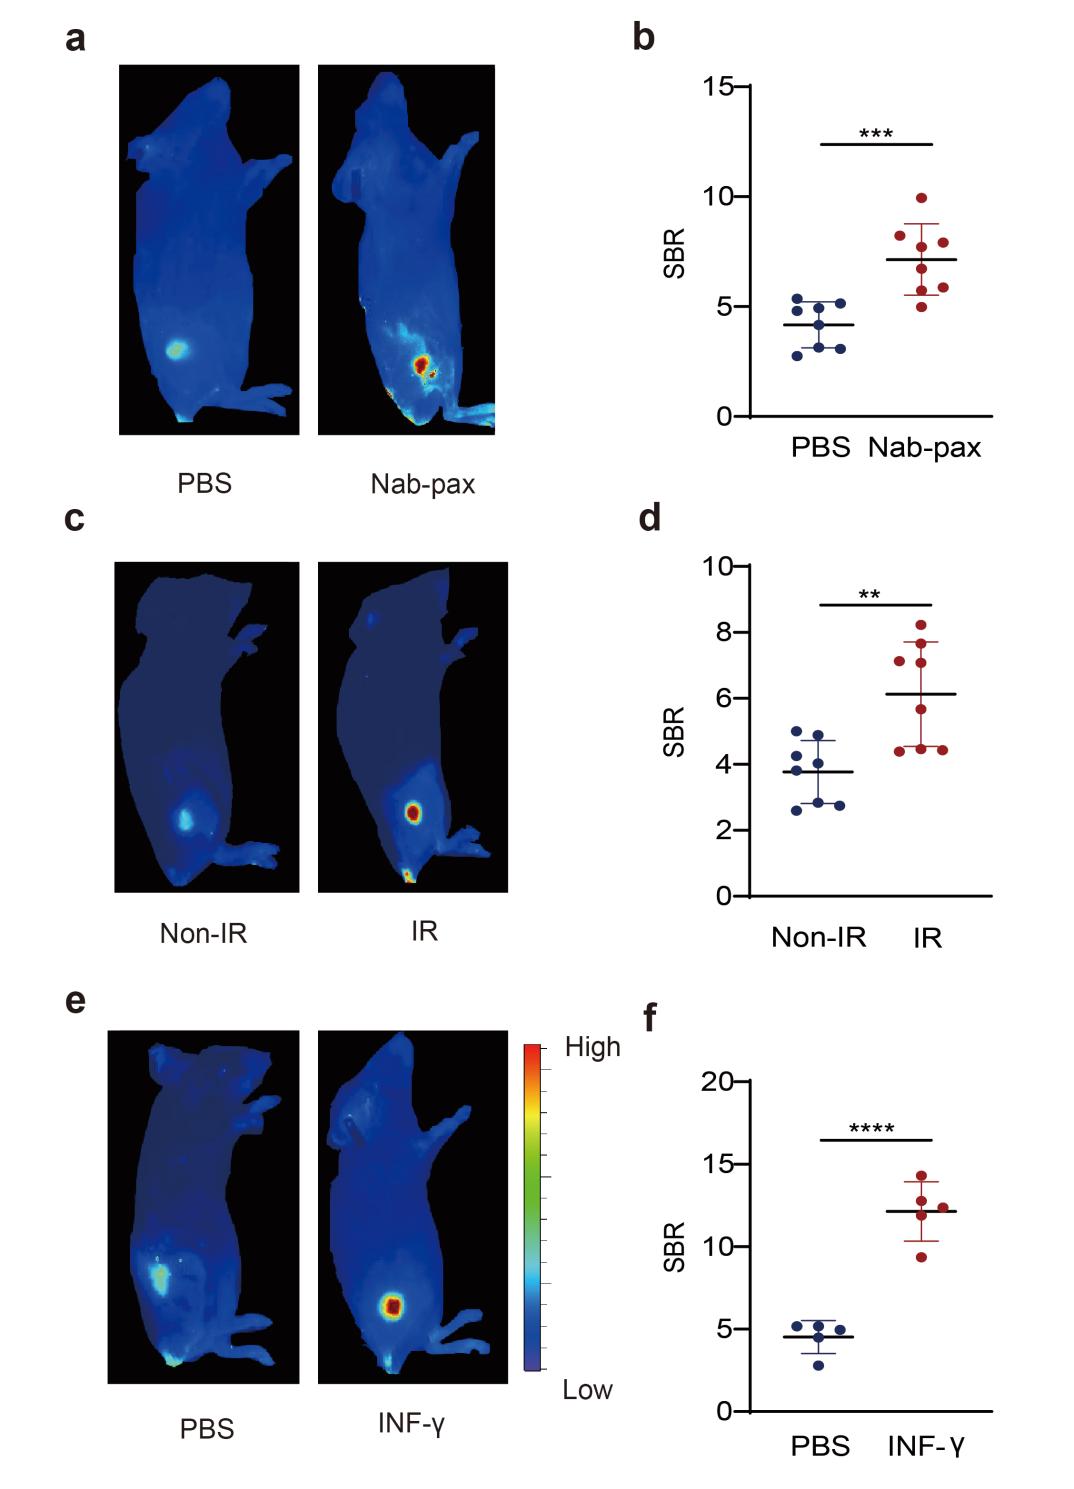


**Supplementary Fig. 12. Dynamic changes in the PD-L1 mouse model.**

(a, b) Nab-paclitaxel (Nab-pax) combined with PD-1 therapy. (c, d) IR combined with PD-1 therapy. (e, f) INF-γ combined with PD-1 therapy. (a, c, e) The fluorescent picture after Nab-pax (a), IR (c), INF-γ (e) intervention on day 8 and (b, d, f) their quantitation. Data are represented as the mean ± standard deviation (n=3), *** *P* < 0.001, ** *P* < 0.01, and **P* < 0.05.


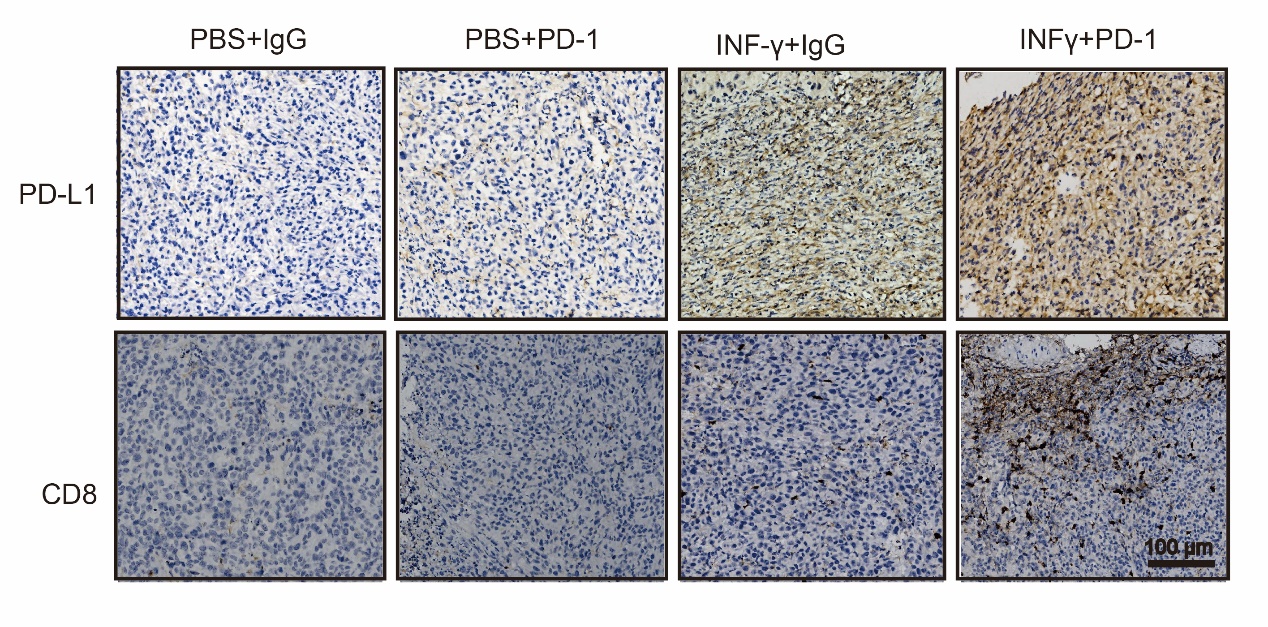


**Supplementary Fig. 13. PD-L1 and CD8 expression after PD-1 combined with INF-γ therapy.**

The expression (immunohistochemistry) of PD-L1 and CD8 in every treatment group after PD-1 concomitant with INF-γtherapy. Scale bar =100 µm.
